# Supplementary material for: A new detection mechanism involving keto–enol tautomerization: selective fluorescence detection of Al(iii) by dehydration of secondary alcohols in mixed DMSO/aqueous media
Source: Royal Society of Chemistry journal article supplement (doi:10.1039/c5ra23937k), 2016-01-01
Supplement: c5ra23937k1.pdf [file c5ra23937k1.pdf]

# *RSC Advances*

(revised)

Jan 8, 2016

## *Supporting information*

### A New Detection Mechanism Involving Keto-Enol Tautomerization: Selective Fluorescence Detection of Al(III) by Dehydration of Secondary Alcohols in Mixed DMSO/Aqueous Media

Madhubabu Alaparthi, Kadarkaraisamy Mariappan, Eric Dufek, Mariah Hoffman and Andrew G. Sykes

|                                                                                                                                                                                                                                                       |    |
|-------------------------------------------------------------------------------------------------------------------------------------------------------------------------------------------------------------------------------------------------------|----|
| Figure S1: <sup>1</sup> H NMR spectrum of compound <b>2</b> in DMSO-d <sub>6</sub> .                                                                                                                                                                  | 3  |
| Figure S2: COSY spectrum of compound <b>2</b> in DMSO-d <sub>6</sub> .                                                                                                                                                                                | 3  |
| Figure S3: COSY spectrum of compound <b>2</b> in DMSO-d <sub>6</sub> D <sub>2</sub> O exchange.                                                                                                                                                       | 4  |
| Figure S4: <sup>13</sup> C NMR spectrum of compound <b>2</b> in DMSO-d <sub>6</sub> .                                                                                                                                                                 | 4  |
| Figure S5: ESI-MS spectrum of compound <b>2</b> .                                                                                                                                                                                                     | 5  |
| Figure S6: IR spectrum of compound <b>2</b> .                                                                                                                                                                                                         | 5  |
| Figure S7: <sup>1</sup> H NMR spectrum of compound <b>4</b> in CDCl <sub>3</sub> .                                                                                                                                                                    | 6  |
| Figure S8: <sup>13</sup> C NMR spectrum of compound <b>4</b> in CDCl <sub>3</sub> .                                                                                                                                                                   | 6  |
| Figure S9: Excitation and Emission spectrum of 3.0 mL of 100μM compound <b>2</b> in DMSO + pH = 7 buffer (10%). λ <sub>ex</sub> = 365 nm.                                                                                                             | 7  |
| Figure S10: Fluorescence spectrum of 10 <sup>-4</sup> M compound <b>2</b> in DMSO (90%) + pH = 7 buffer (10%) with added 10 - 130 μL of 1.2x10 <sup>-1</sup> M Al(III) (ClO <sub>4</sub> ) <sub>3</sub> in water (0-52eq). λ <sub>ex</sub> = 365 nm.  | 7  |
| Figure S11: Fluorescence spectrum of 3.0 mL of 100μM compound <b>2</b> in DMSO + pH = 7 buffer (10%) with added 30 eq of 1.2x10 <sup>-1</sup> M Al(III) salts (Chloride, perchlorate, nitrate, sulfate) in water λ <sub>ex</sub> = 365nm.             | 8  |
| Figure S12: (A) <sup>1</sup> H NMR spectrum of compound <b>4</b> in CDCl <sub>3</sub> , (B) <sup>1</sup> H NMR spectrum of compound <b>4</b> in DMSO-d <sub>6</sub> and (C) <sup>1</sup> H NMR spectrum of compound <b>3</b> in DMSO-d <sub>6</sub> . | 8  |
| Figure S13: Fluorescence spectrum of 3.0 mL of 100μM compound <b>5</b> in CH <sub>3</sub> CN with added 50μL of pH = 1 buffer. λ <sub>ex</sub> = 365 nm.                                                                                              | 9  |
| Figure S14: Emission spectra of <b>7</b> + Al(III) and Hg(II).                                                                                                                                                                                        | 9  |
| Figure S15: <sup>1</sup> H NMR spectrum of compound <b>7</b> in CDCl <sub>3</sub> .                                                                                                                                                                   | 10 |
| Figure S16: COSY spectrum of compound <b>7</b> in CDCl <sub>3</sub> .                                                                                                                                                                                 | 10 |
| Figure S17: COSY spectrum of compound <b>7</b> in CDCl <sub>3</sub> D <sub>2</sub> O exchange.                                                                                                                                                        | 11 |
| Figure S18: <sup>13</sup> C NMR spectrum of compound <b>7</b> in CDCl <sub>3</sub> .                                                                                                                                                                  | 11 |
| Figure S19: Mass spectrum of compound <b>7</b> .                                                                                                                                                                                                      | 12 |
| Figure S20: <sup>1</sup> H NMR spectrum of compound <b>6</b> in CDCl <sub>3</sub> .                                                                                                                                                                   | 12 |
| Figure S21: <sup>13</sup> C NMR spectrum of compound <b>6</b> in CDCl <sub>3</sub> .                                                                                                                                                                  | 13 |
| Figure S22: Mass spectrum of compound <b>6</b> .                                                                                                                                                                                                      | 13 |
| Figure S23: Thermal Ellipsoid diagram (30%) of compound <b>6</b> with one water molecule; hydrogen bond distances between donor and acceptor.                                                                                                         | 14 |
| Figure S24: <sup>1</sup> H NMR spectrum of <b>11</b> in DMSO-d <sub>6</sub> .                                                                                                                                                                         | 14 |
| Figure S25: <sup>13</sup> C NMR spectrum of compound <b>11</b> in CDCl <sub>3</sub> .                                                                                                                                                                 | 15 |
| Figure S26: Mass spectroscopy of compound <b>11</b> .                                                                                                                                                                                                 | 15 |
| Figure S27: (A) <sup>1</sup> H NMR spectrum of <b>2</b> in DMSO-d <sub>6</sub> . (B) <b>2</b> in DMSO-d <sub>6</sub> + Hg(II) in CD <sub>3</sub> CN after 30 min. (C) <b>11</b> in DMSO-d <sub>6</sub> .                                              | 16 |

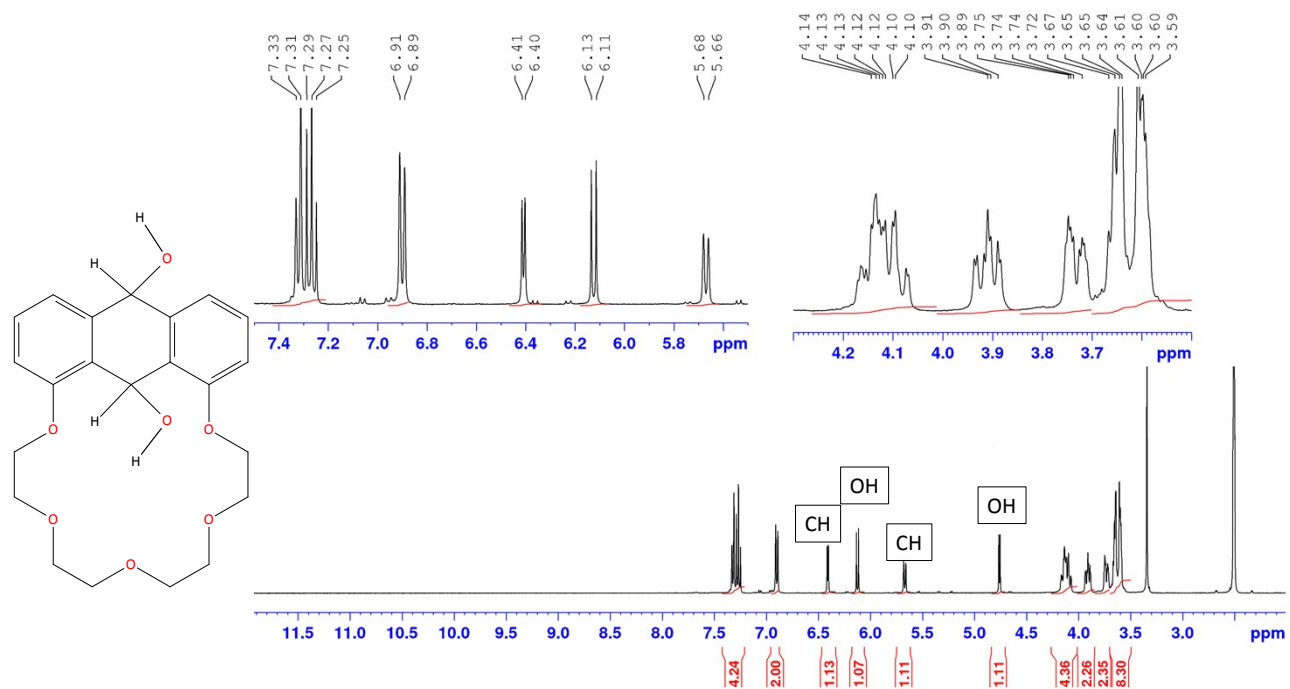

Figure S 1:  $^1\text{H}$  NMR spectrum of compound 2 in  $\text{DMSO-d}_6$ .

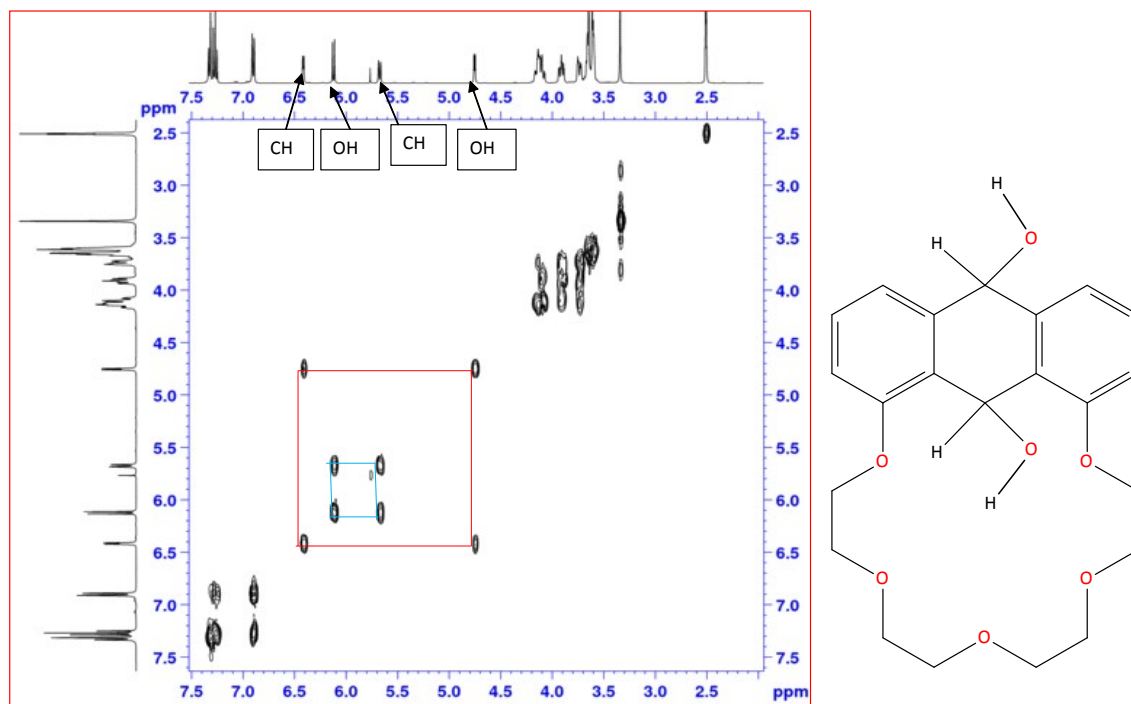

Figure S2: COSY spectrum of compound 2 in  $\text{DMSO-d}_6$ .

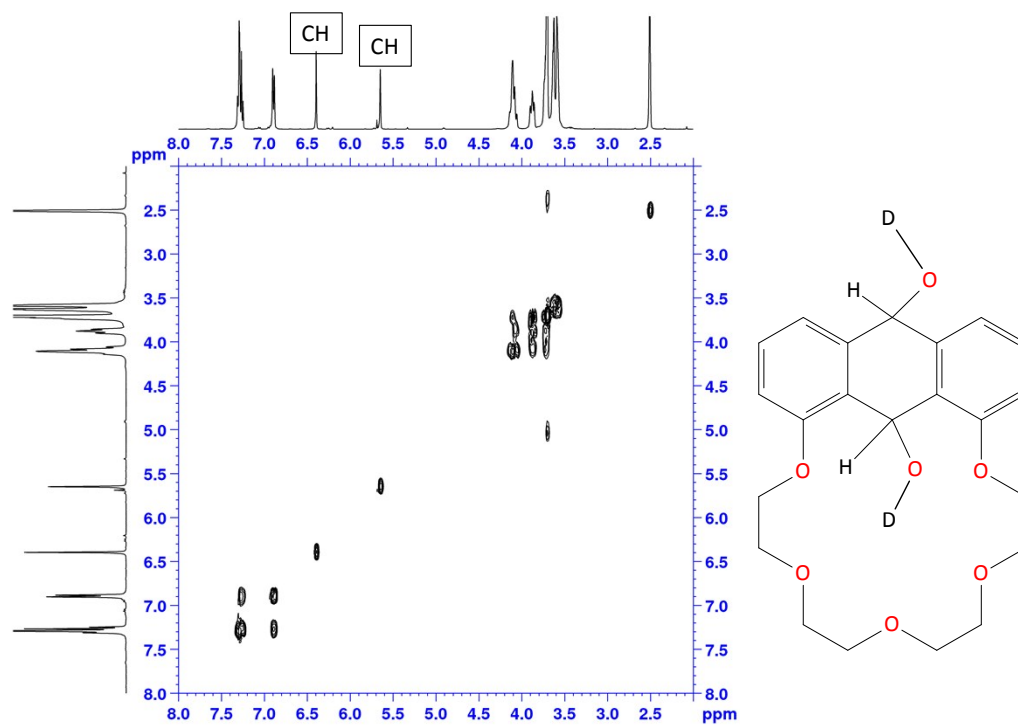

Figure S3: COSY spectrum of compound **2** in DMSO-d<sub>6</sub> D<sub>2</sub>O exchange.

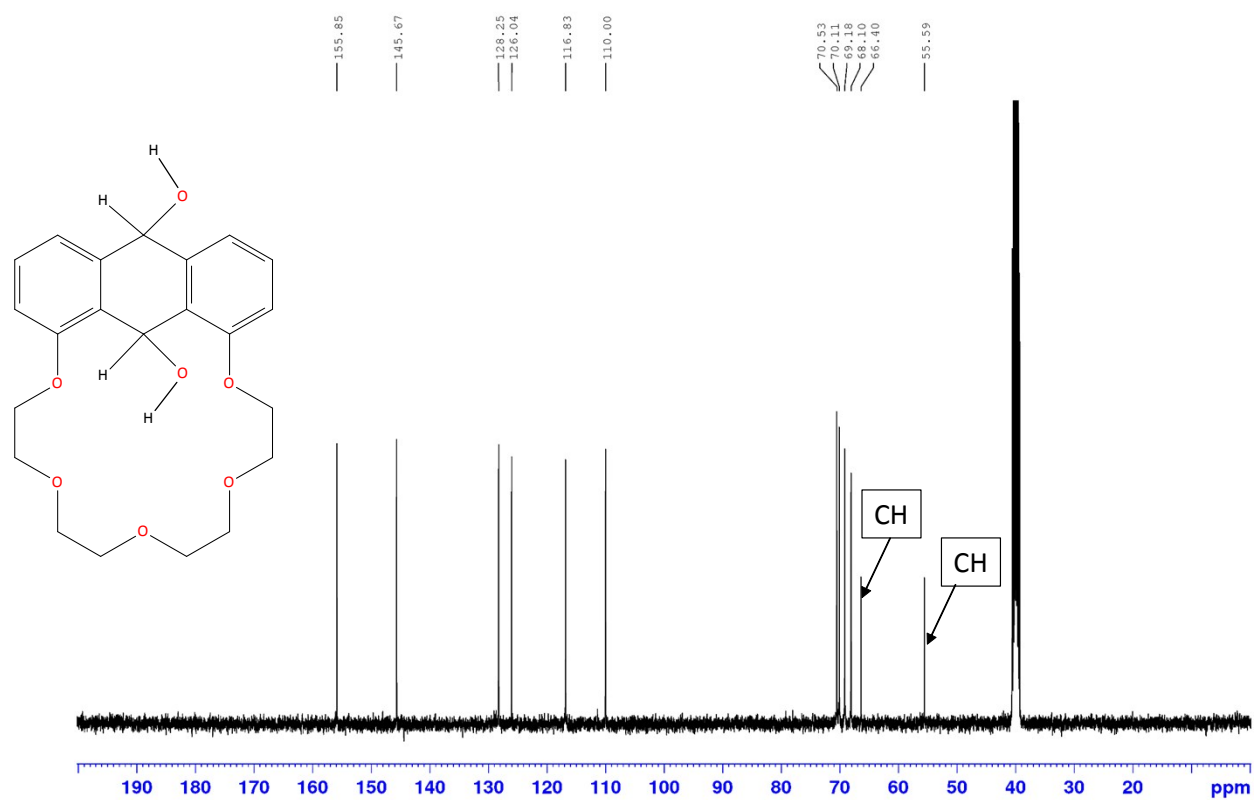

Figure S4: <sup>13</sup>C NMR spectrum of compound **2** in DMSO-d<sub>6</sub>.

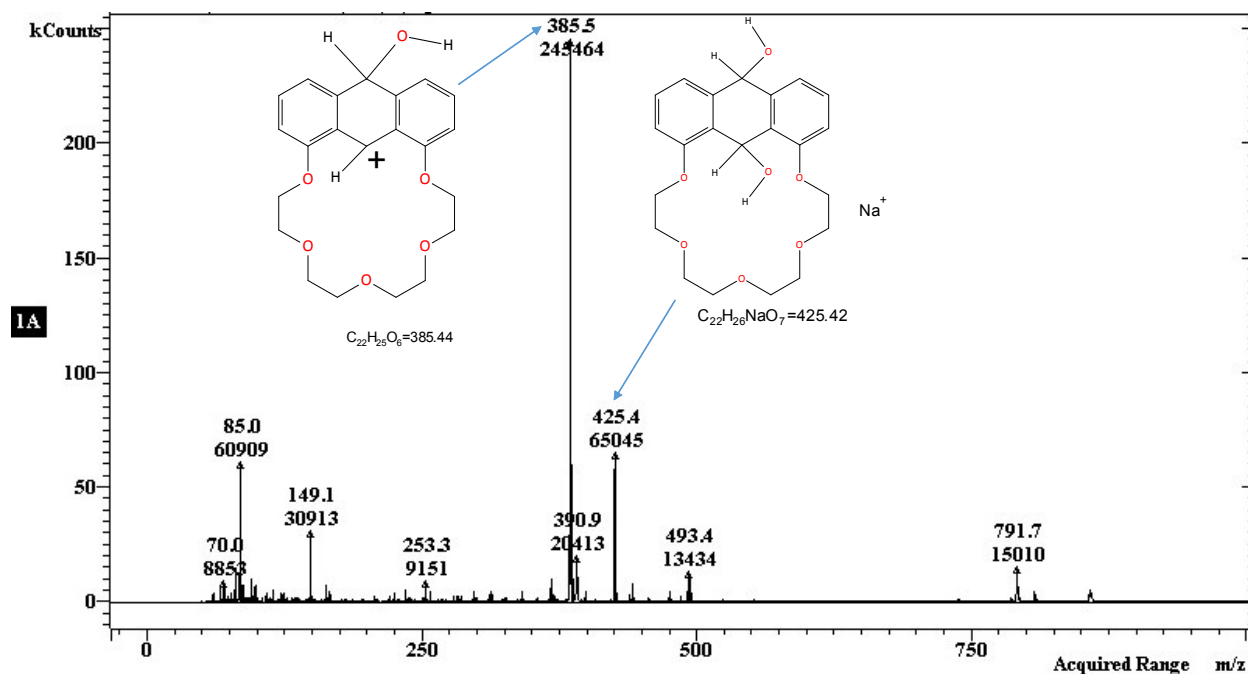

Figure S5: ESI-MS spectrum of compound 2.

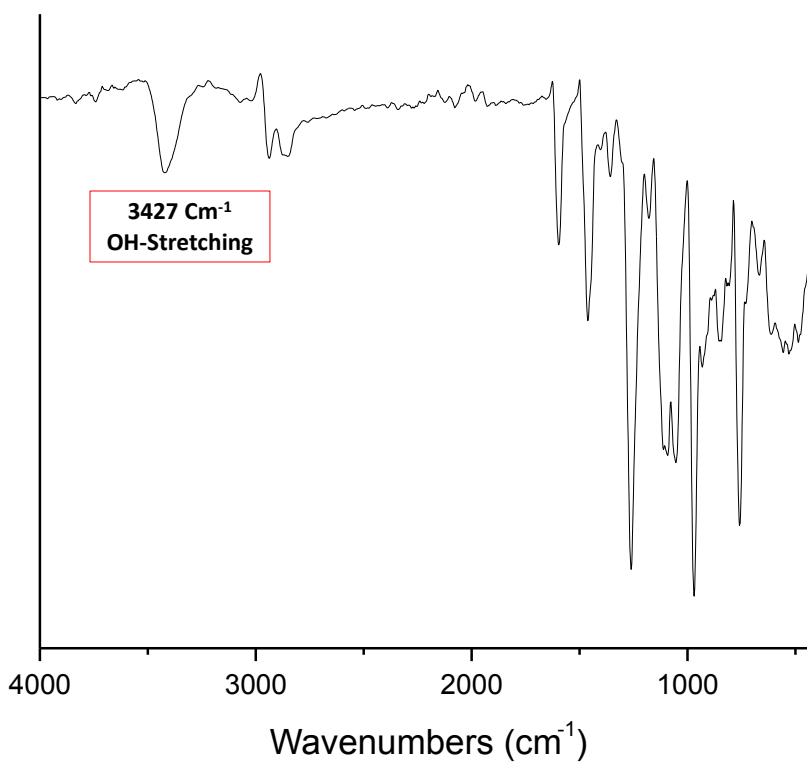

Figure S6: IR spectrum of compound 2.



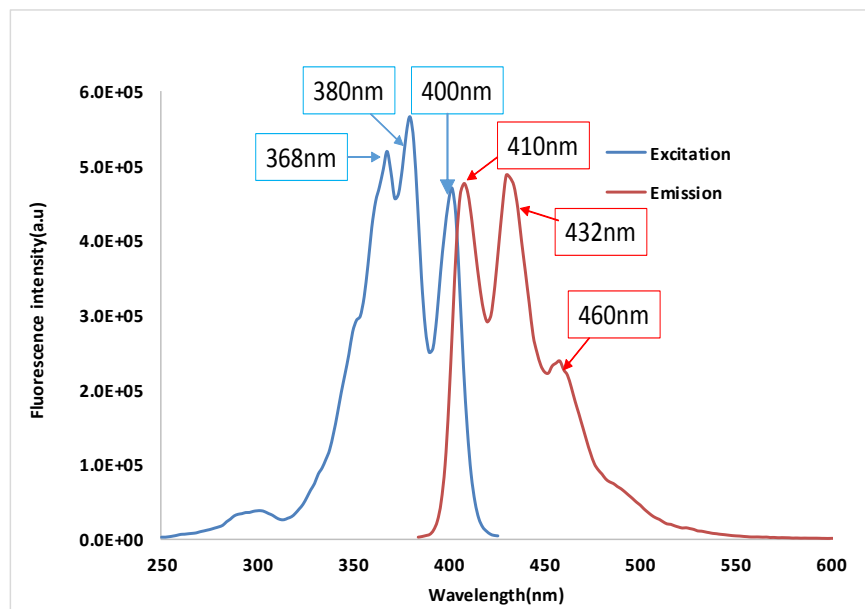

Figure S9: Excitation and Emission spectrum of 3.0 mL of 100 $\mu$ M compound **2** in DMSO + pH = 7 buffer (10%).  $\lambda_{exc}$  = 365 nm.

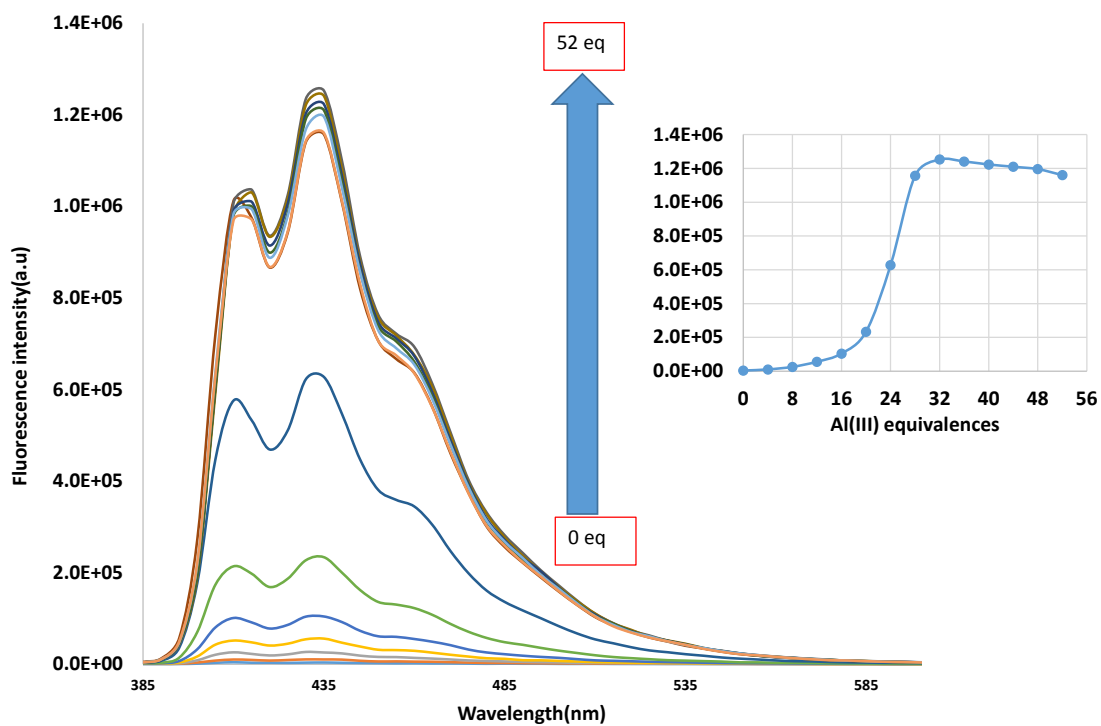

Figure S10: Fluorescence spectrum of  $10^{-4}$  M compound **2** in DMSO (90%) + pH = 7 buffer (10%) with added 10 - 130  $\mu$ L of  $1.2 \times 10^{-1}$  M Al(III) ( $\text{ClO}_4$ )<sub>3</sub> in water (0-52eq).  $\lambda_{exc}$  = 365 nm.

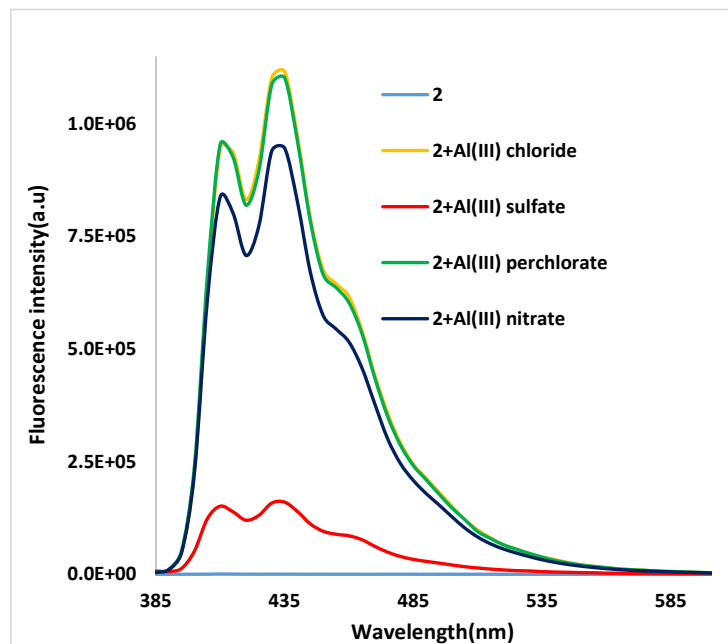

Figure S11: Fluorescence spectrum of 3.0 mL of 100uM compound **2** in DMSO + pH = 7 buffer (10%) with added 30 eq of  $1.2 \times 10^{-1}$  M Al(III) salts (Chloride, perchlorate, nitrate, sulfate) in water  $\lambda_{exc} = 365$ nm.

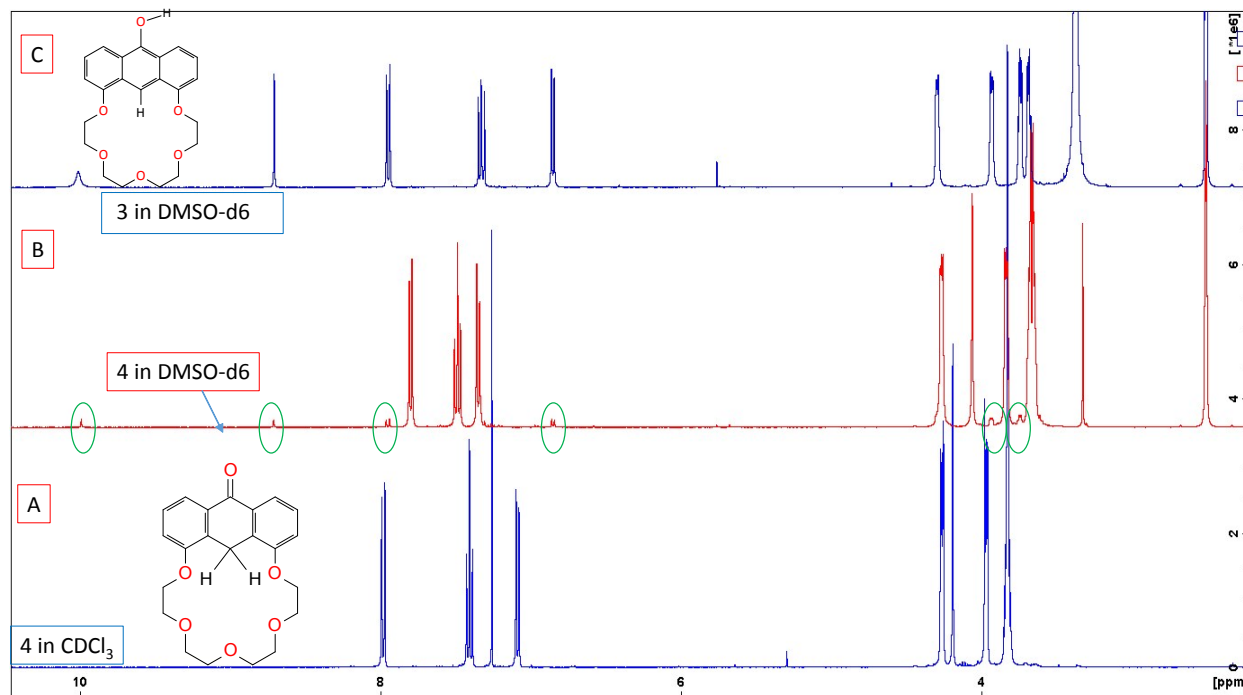

Figure S12: (A) <sup>1</sup>H NMR spectrum of compound **4** in CDCl<sub>3</sub>, (B) <sup>1</sup>H NMR spectrum of compound **4** in DMSO-d<sub>6</sub> and (C) <sup>1</sup>H NMR spectrum of compound **3** in DMSO-d<sub>6</sub>.



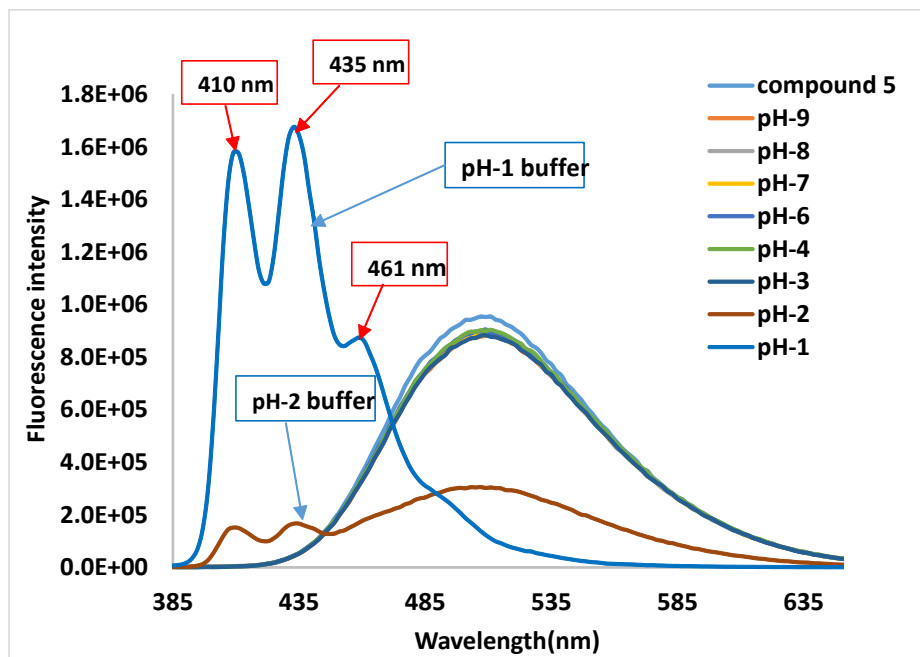

Figure S13: Fluorescence spectrum of 3.0 mL of 100uM compound **5** in CH<sub>3</sub>CN with added 50ul of pH = 1 buffer.  $\lambda_{ex}$  = 365 nm.

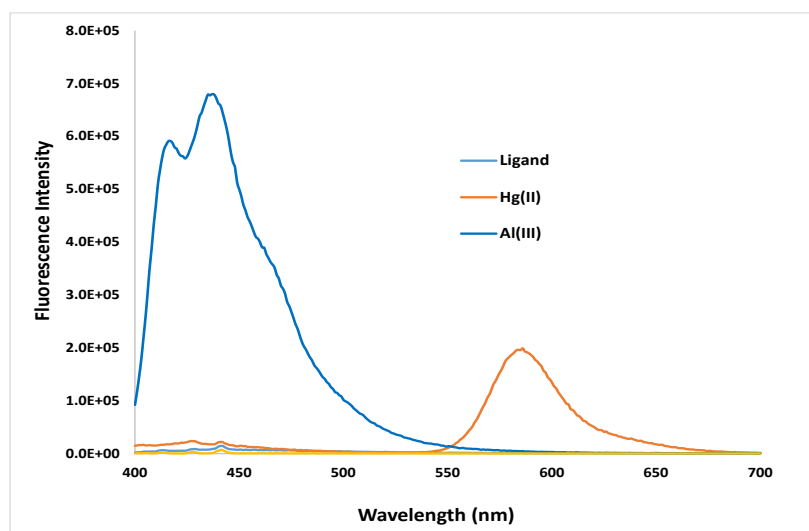

Figure S14: Emission spectra of  $4.0 \times 10^{-5}$  M **7** in CH<sub>3</sub>CN with 5.0 equivalents of added Al(III) or Hg(II).  $\lambda_{ex}$  = 390 nm.

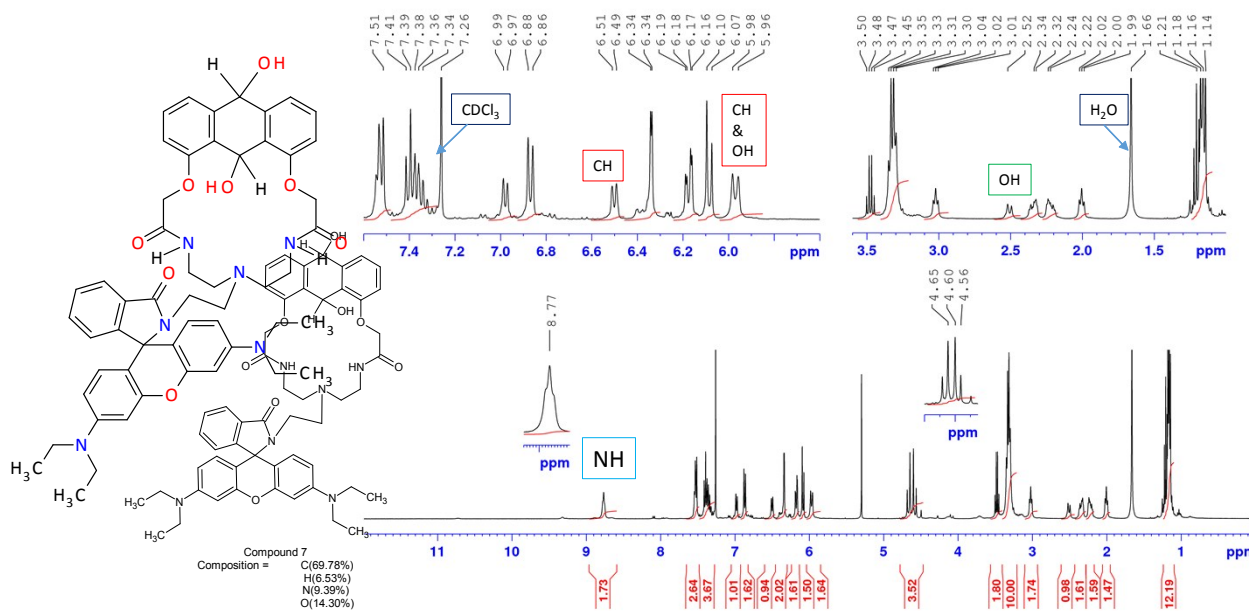

Figure S15:  $^1\text{H}$  NMR spectrum of compound **7** in  $\text{CDCl}_3$ .

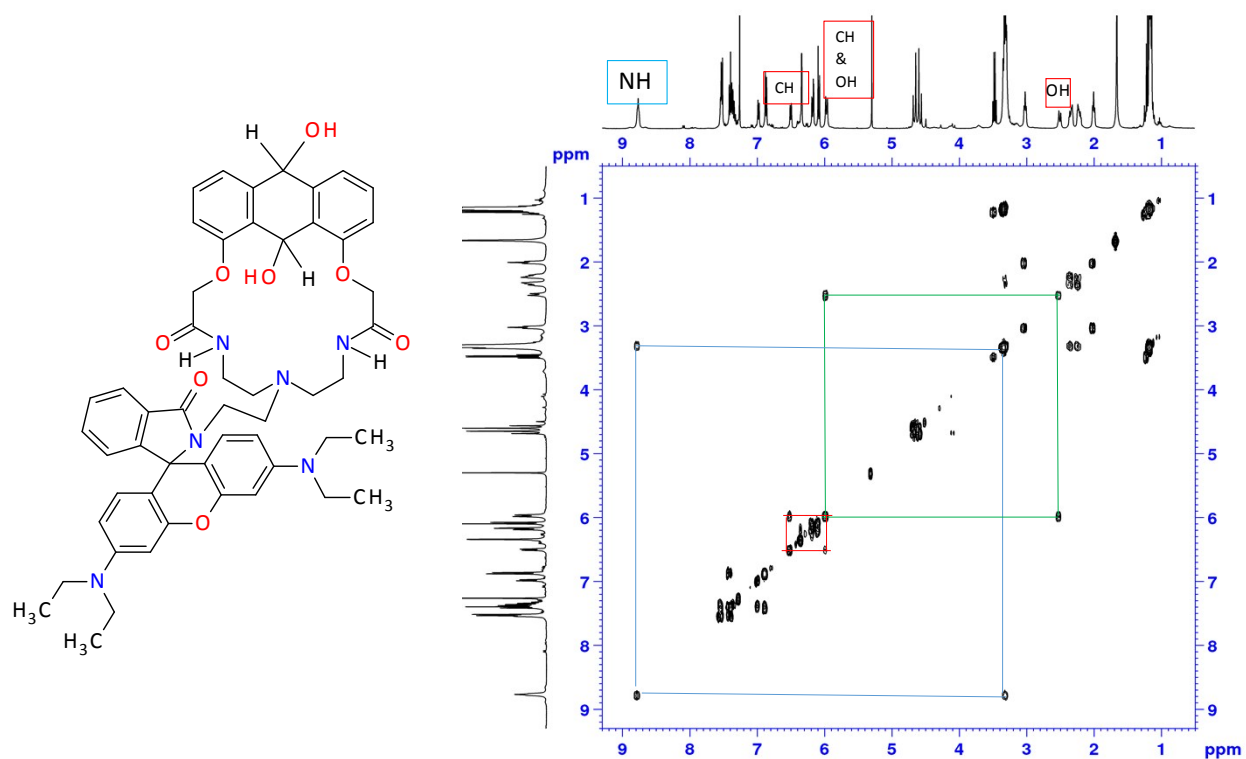

Figure S16: COSY spectrum of compound **7** in  $\text{CDCl}_3$ .

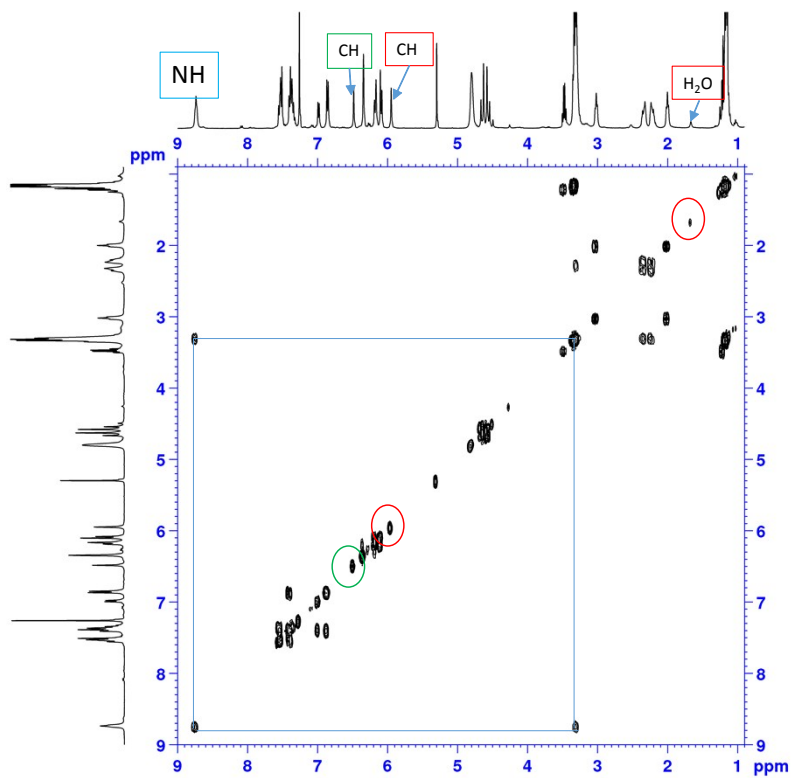

Figure S17: COSY spectrum of compound **7** in  $\text{CDCl}_3$   $\text{D}_2\text{O}$  exchange.

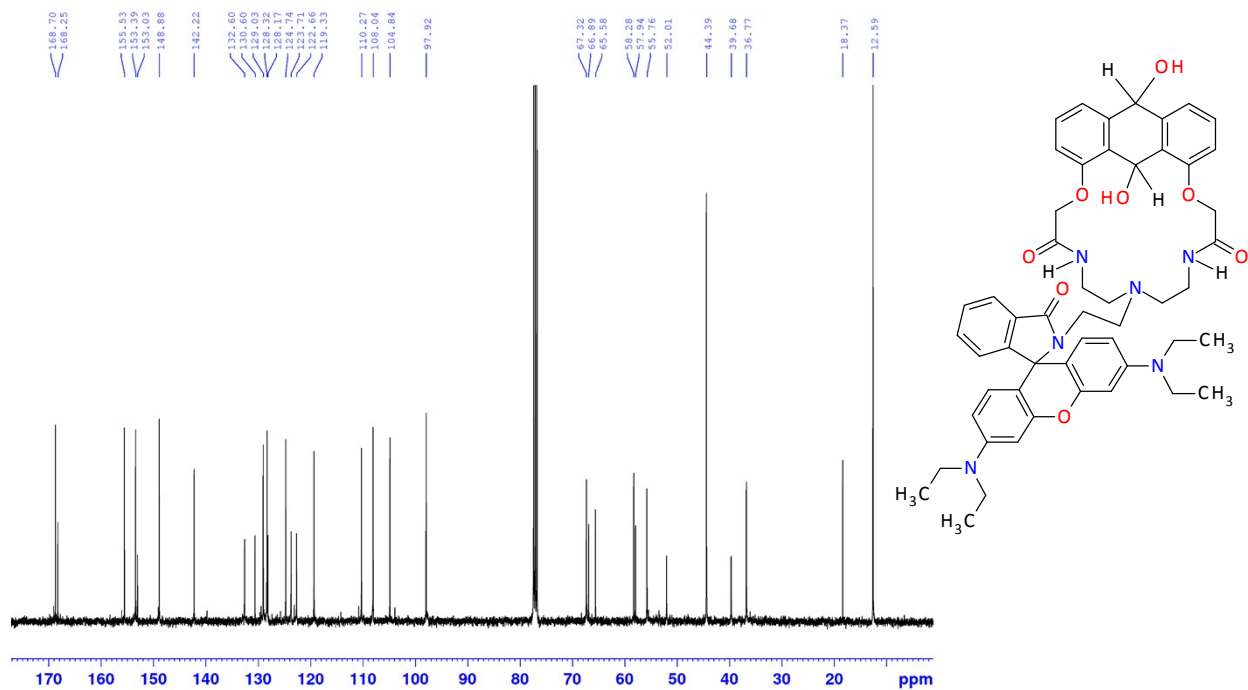

Figure S18:  $^{13}\text{C}$  NMR spectrum of compound **7** in  $\text{CDCl}_3$ .

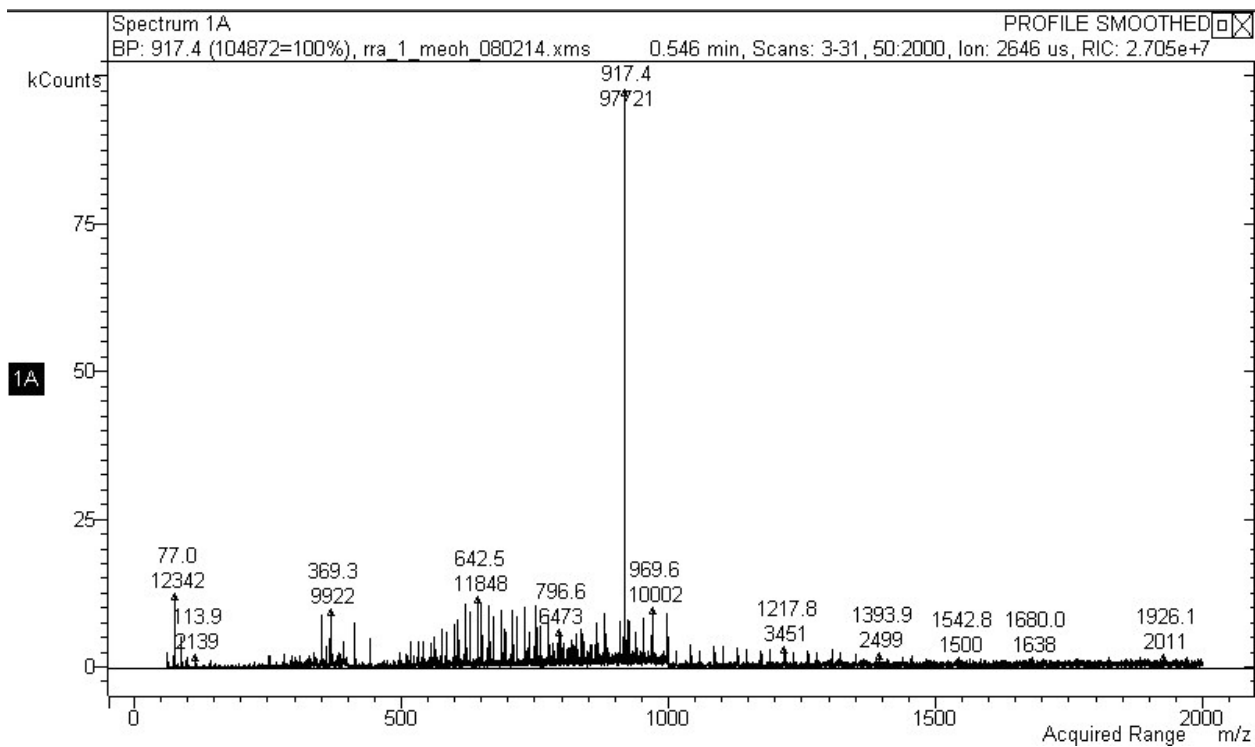

Figure S19: Mass spectrum of compound 7.

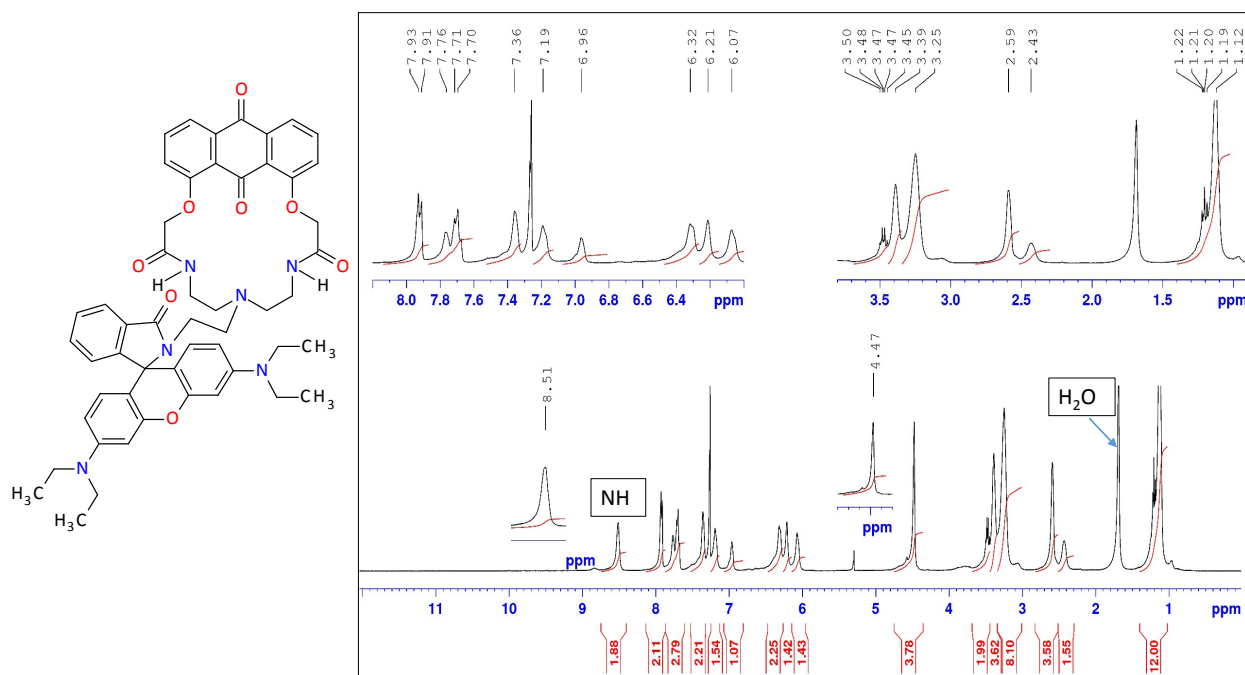

Figure S20: <sup>1</sup>H NMR spectrum of compound 6 in CDCl<sub>3</sub>.

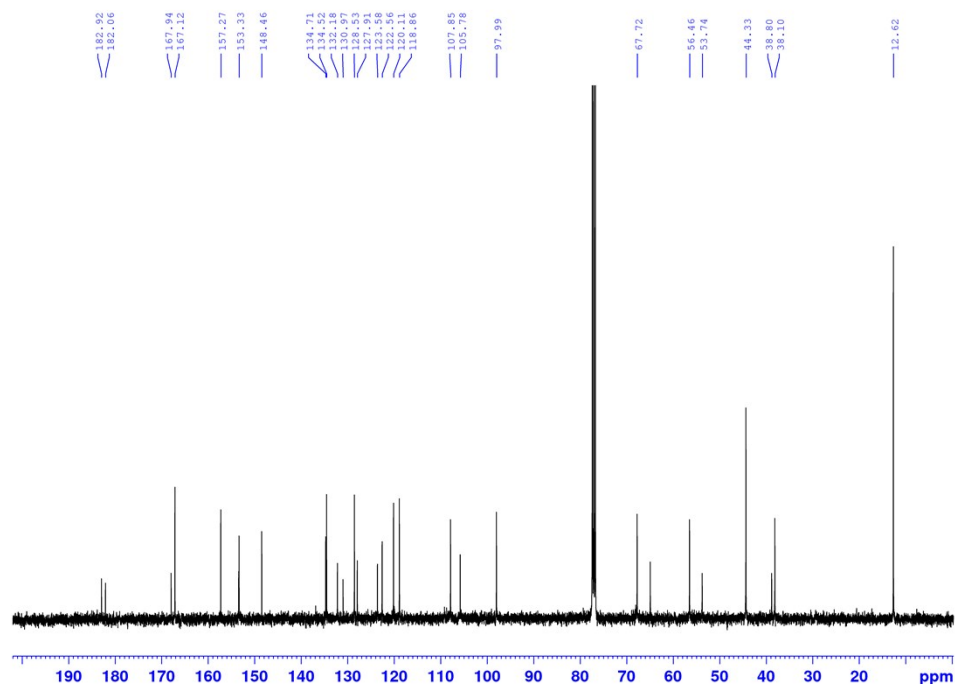

Figure S21:  $^{13}\text{C}$  NMR spectrum of compound **6** in  $\text{CDCl}_3$ .

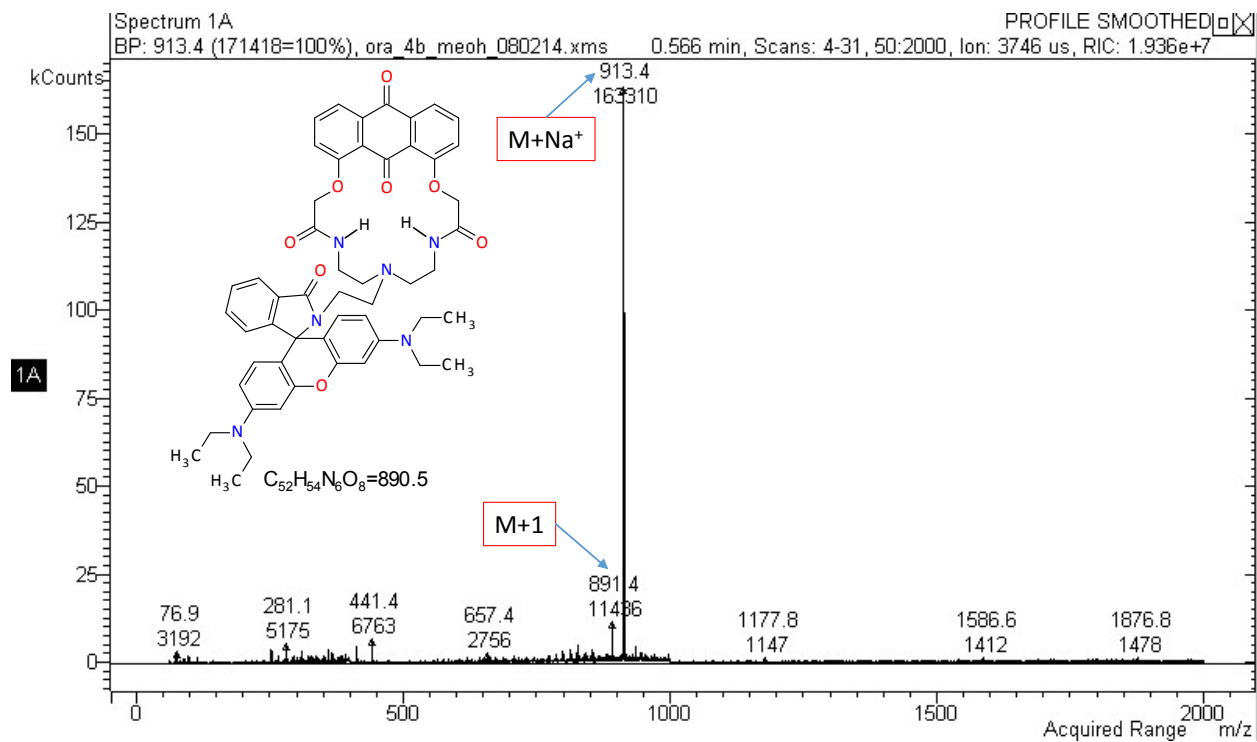

Figure S22: Mass spectrum of compound **6**.

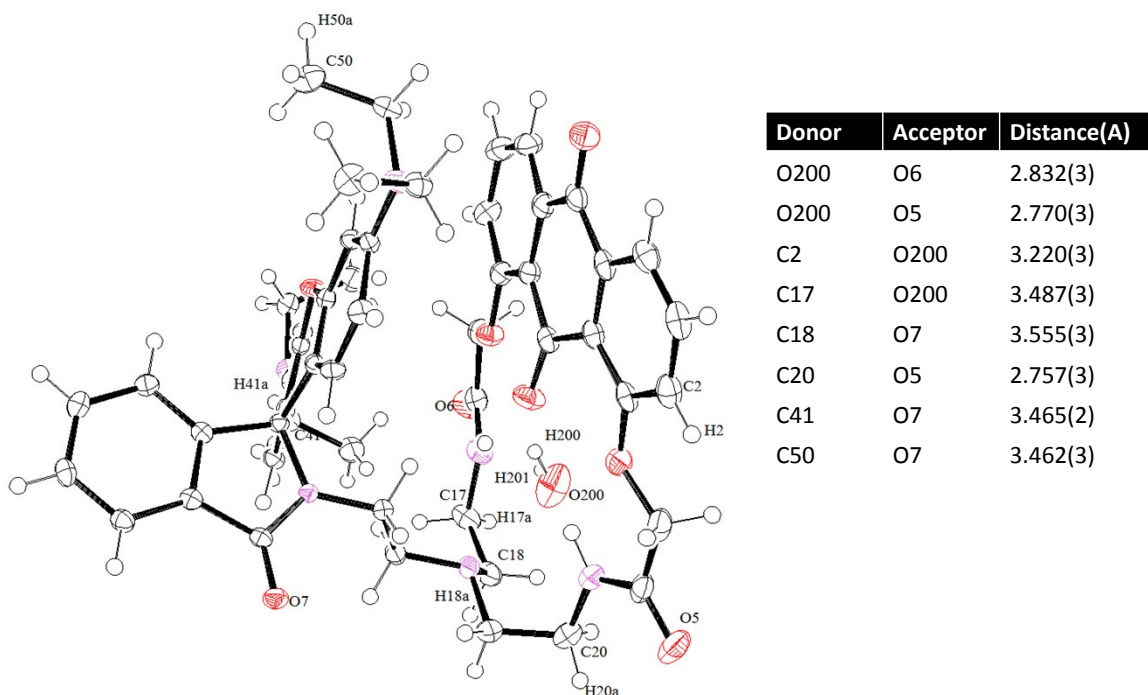

Figure S23: Thermal Ellipsoid diagram (30%) of compound **6** with one water molecule; hydrogen bond distances between donor and acceptor.

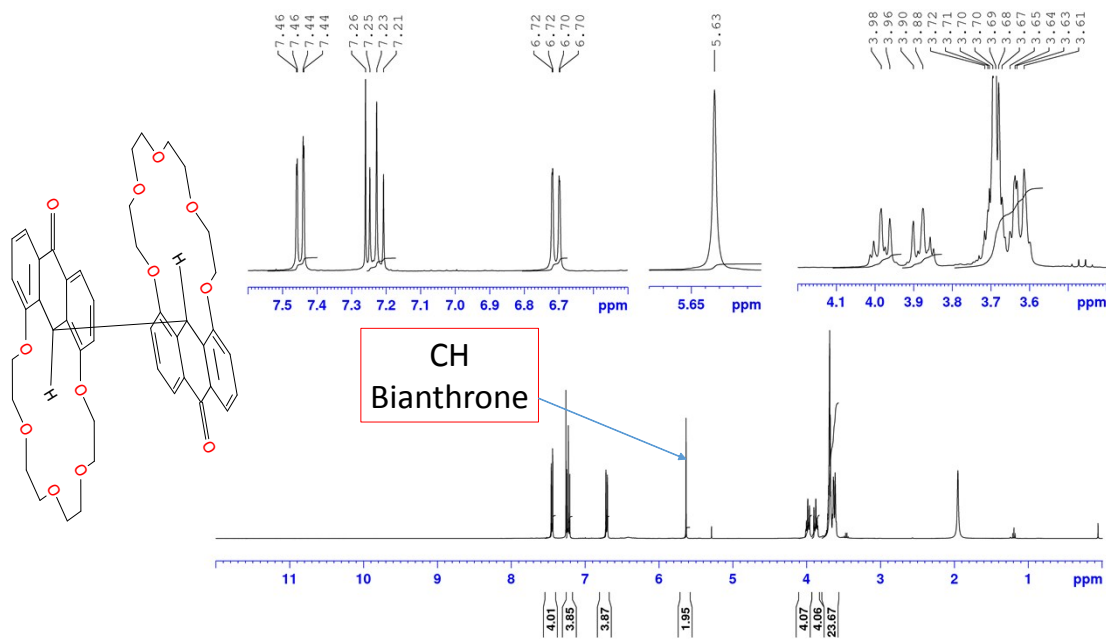

Figure S24:  $^1\text{H}$  NMR spectrum of **11** in DMSO- $d_6$ .

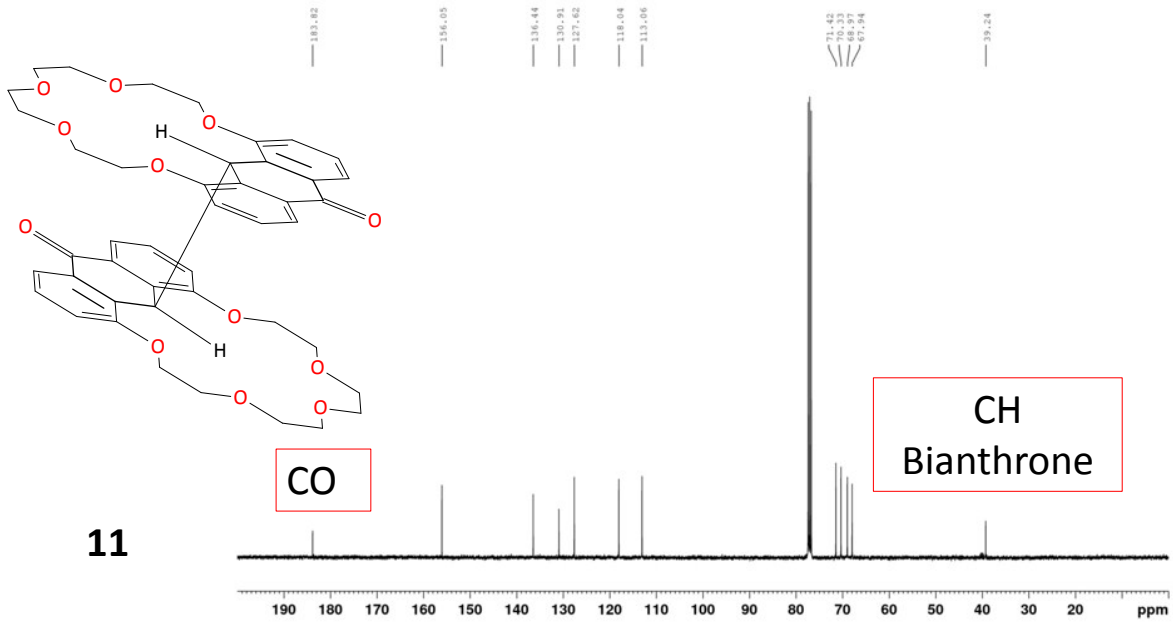

Figure S25:  $^{13}\text{C}$  NMR spectrum of compound **11** in  $\text{CDCl}_3$ .

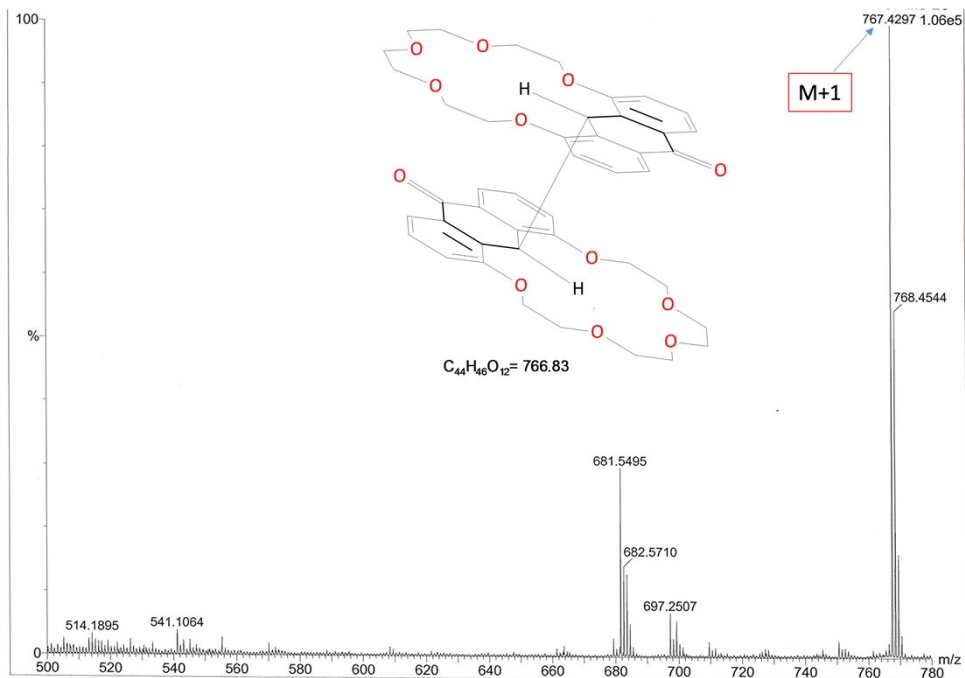

Figure S26: Mass spectroscopy of compound **11**.

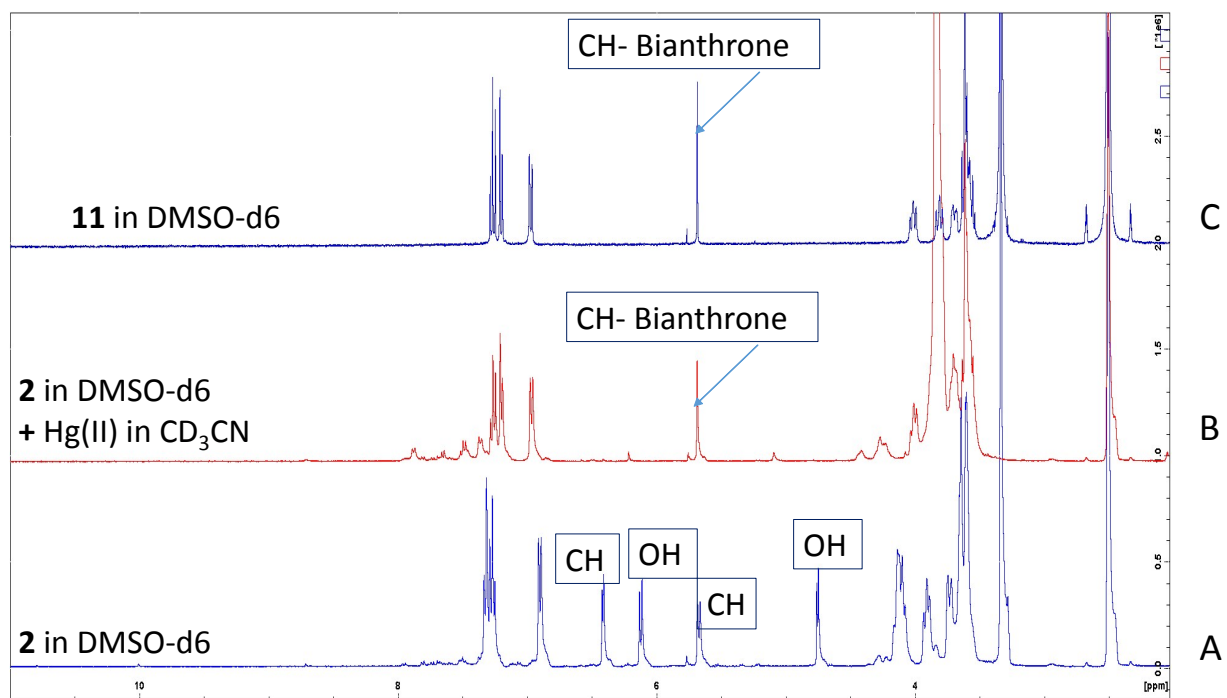

Figure S27: (A)  $^1\text{H}$  NMR spectrum of **2** in  $\text{DMSO-d}_6$ . (B) **2** in  $\text{DMSO-d}_6$  +  $\text{Hg(II)}$  in  $\text{CD}_3\text{CN}$  after 30 min. (C) **11** in  $\text{DMSO-d}_6$ .



Table S1: Crystallographic data of compounds **2**, **4**, **6** and **11**.

|                                           | <b>2</b>                                       | <b>4</b>                                       | <b>6.H<sub>2</sub>O</b>                                                          | <b>11</b>                                       |
|-------------------------------------------|------------------------------------------------|------------------------------------------------|----------------------------------------------------------------------------------|-------------------------------------------------|
| Empirical formula                         | C <sub>22</sub> H <sub>26</sub> O <sub>7</sub> | C <sub>22</sub> H <sub>24</sub> O <sub>6</sub> | C <sub>52</sub> H <sub>54</sub> N <sub>6</sub> O <sub>8</sub> . H <sub>2</sub> O | C <sub>44</sub> H <sub>46</sub> O <sub>12</sub> |
| Formula weight                            | 402.43                                         | 384.40                                         | 909.02                                                                           | 766.8                                           |
| Wavelength                                | MoK <sub>α</sub> 0.71073                       | MoK <sub>α</sub> 0.71073                       | MoK <sub>α</sub> 0.71073                                                         | MoK <sub>β</sub> 0.71073                        |
| System                                    | SMART APEII                                    | SMART APEII                                    | SMART APEXII                                                                     | SMART APEXII                                    |
| Temperature, K                            | 100(2)                                         | 100(2)                                         | 100(2)                                                                           | 295(2)                                          |
| Crystal system                            | Monoclinic                                     | Monoclinic                                     | Monoclinic                                                                       | Monoclinic                                      |
| Space group                               | P21/c                                          | P21/n                                          | P21/n                                                                            | P21/c                                           |
| <i>a</i> , Å                              | 7.7175(6)                                      | 12.2726(5)                                     | 11.6503(6)                                                                       | 12.537(1)                                       |
| <i>b</i> , Å                              | 13.5383(11)                                    | 13.7003(6)                                     | 26.3127(13)                                                                      | 11.121(1)                                       |
| <i>c</i> , Å                              | 18.6624(15)                                    | 22.4713(10)                                    | 14.6567(7)                                                                       | 13.500(1)                                       |
| $\alpha$ , °                              | 90                                             | 90                                             | 90                                                                               | 90                                              |
| $\beta$ , °                               | 90.12(1)                                       | 96.75(10)                                      | 96.09(10)                                                                        | 92.734(1)                                       |
| $\gamma$ , °                              | 90                                             | 90                                             | 90                                                                               | 90                                              |
| Volume, Å <sup>3</sup>                    | 1949.9(3)                                      | 3752.1(3)                                      | 4467.7(4)                                                                        | 1880.0(3)                                       |
| Z                                         | 4                                              | 8                                              | 4                                                                                | 2                                               |
| Density (calc)g.cm <sup>-3</sup>          | 1.371                                          | 1.361                                          | 1.351                                                                            | 1.355                                           |
| Absorb. coef. mm <sup>-1</sup>            | 0.102                                          | 0.099                                          | 0.093                                                                            | 0.098                                           |
| <i>F</i> (000)                            | 1632                                           | 1632                                           | 1928                                                                             | 812                                             |
| $\theta$ range                            | 2.64-25.42                                     | 2.24-28.79                                     | 1.55-26.50                                                                       | 1.7- 25.5                                       |
| Index ranges (h,k,l)                      | ±9,±16,±23                                     | ±16;±18;±30                                    | ±14;-32+33;±18                                                                   | ±15;±13;±16                                     |
| Independent reflections                   | 4020                                           | 9382                                           | 9256                                                                             | 19077                                           |
| Observed reflections                      | 3843                                           | 7974                                           | 6993                                                                             | 3488                                            |
| Max/Min trans.                            | 0.903/0.970                                    | 0.991/0.995                                    | 0.987/0.993                                                                      | 0.976/0.995                                     |
| Data/ restr./ param.                      | 4220/0/270                                     | 9382/0/505                                     | 9256/2/620                                                                       | 3488/7/261                                      |
| Goodness-of-fit                           | 1.079                                          | 1.016                                          | 1.026                                                                            | 1.049                                           |
| Final R indices[>2 $\sigma$ ( <i>I</i> )] | 0.0401                                         | 0.0381                                         | 0.0451                                                                           | 0.0894                                          |
| R indices (all data)                      | 0.0412                                         | 0.0467                                         | 0.0664                                                                           | 0.1219                                          |
| Peak/hole                                 | 0.468, -0.313                                  | 0.357, -0.266                                  | 0.362, -0.306                                                                    | 0.78/-0.74                                      |
| CCDC #                                    | 1436743                                        | 1436744                                        | 1436745                                                                          | 1444688                                         |
